# Supplementary material for: BRCA1/BARD1 ubiquitinates PCNA in unperturbed conditions to promote continuous DNA synthesis
Source: PubMed Central journal article supplement (PMC11106271; doi:10.1038/s41467-024-48427-6), 2024-05-20
Supplement: 41467_2024_48427_MOESM1_ESM.pdf [file 41467_2024_48427_MOESM1_ESM.pdf]

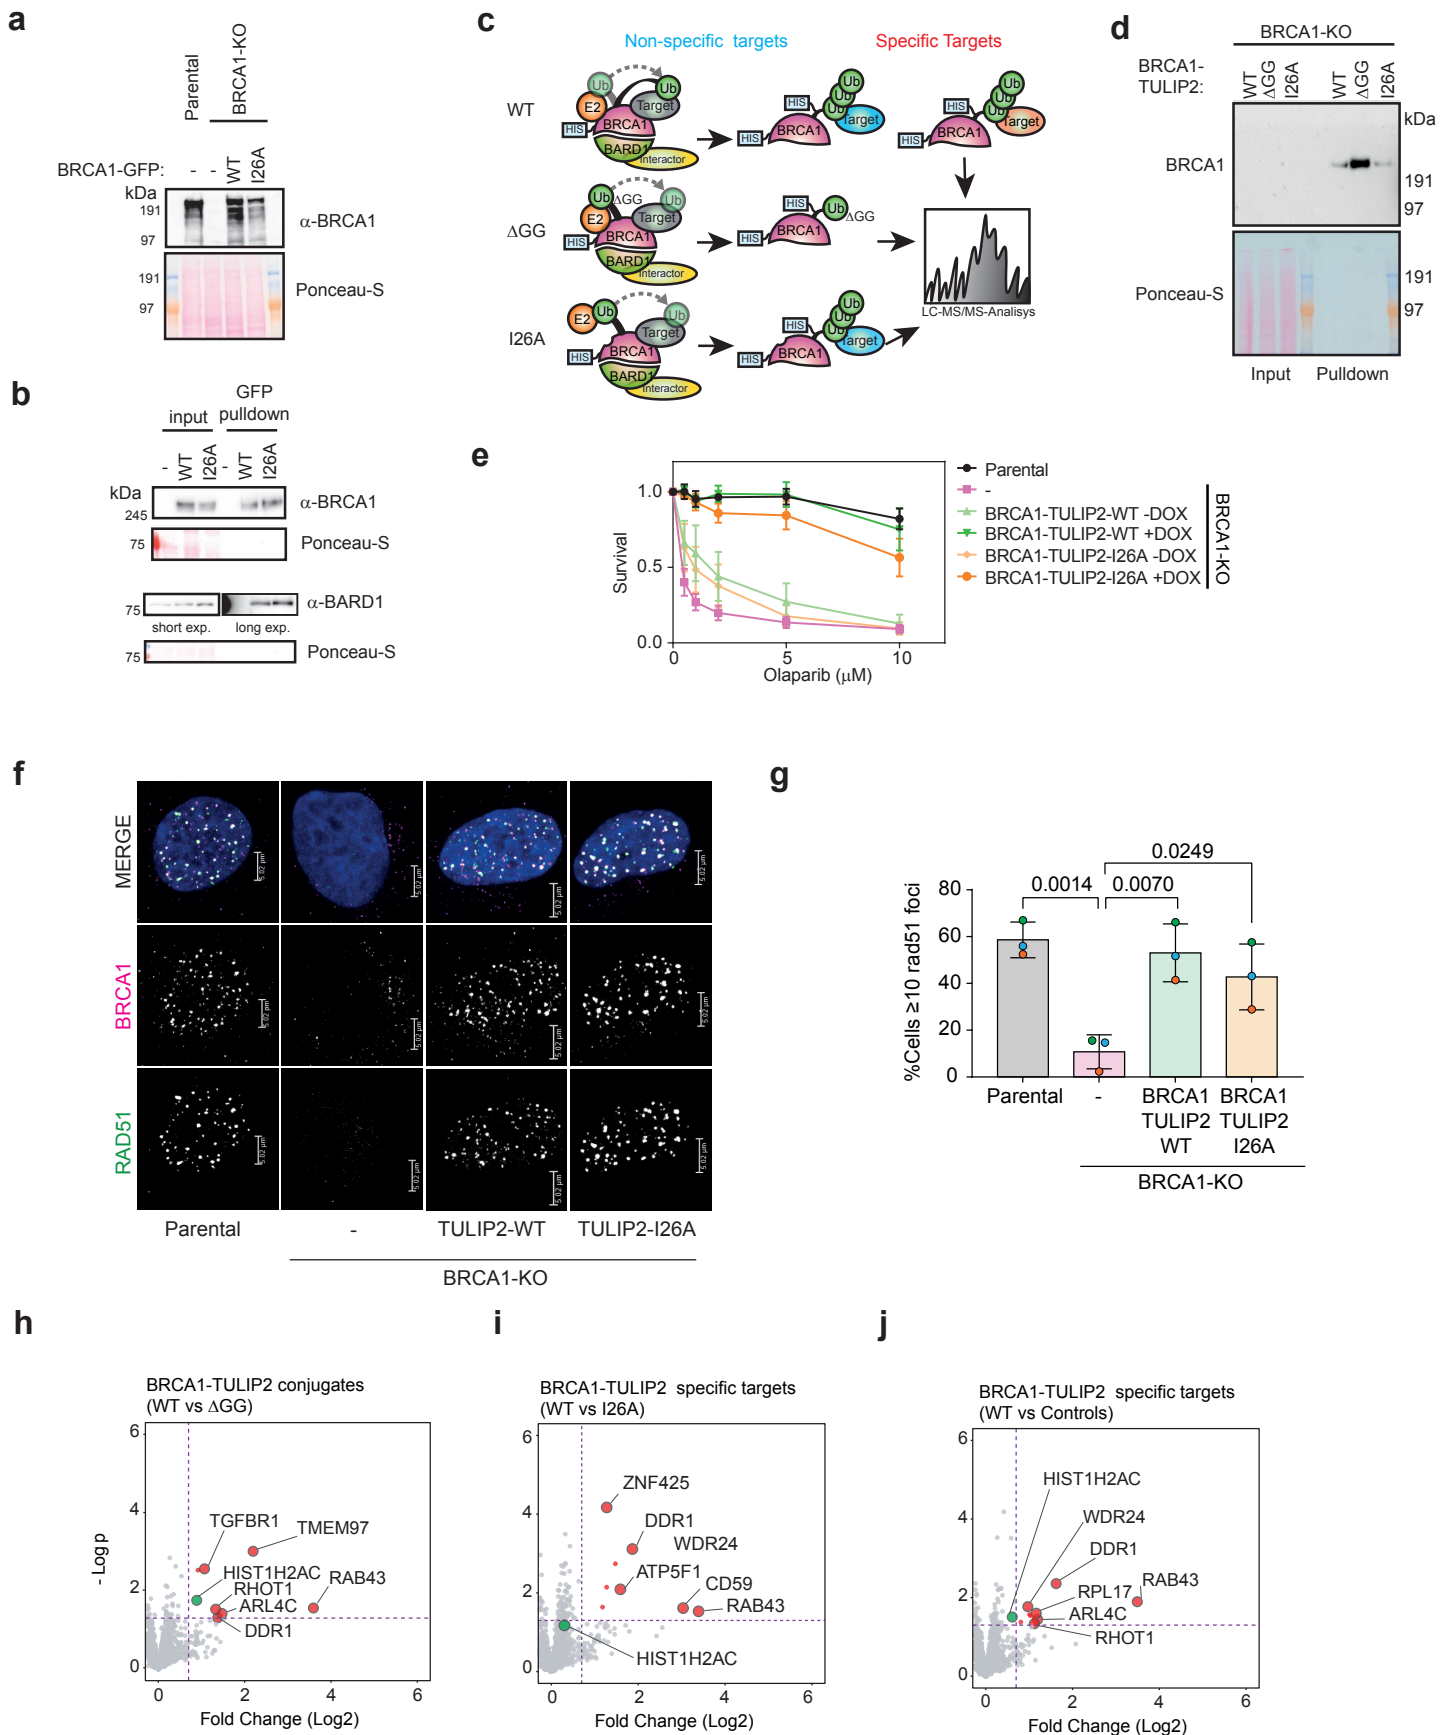

**Supplementary Figure 1. BRCA1-TULIP2 Characterization.** (A) Immunoblot showing BRCA1 levels in Parental and BRCA1-KO cells rescued or not with BRCA1-WT-GFP or BRCA1-I26A-GFP constructs from Figure 1. (B) Immunoblot depicting BARD1 levels co-immunoprecipitated using GFP-trap from the cells in A. (C) BRCA1-TULIP2 Rationale to find BRCA1 specific targets using Mass Spectrometry. (D) Analysis by immunoblotting of TULIP2 pull downs in BRCA1-KO cells rescued with BRCA1-TULIP2 constructs (WT, DGG and I26A). (E) Survival assay after treatment with Olaparib of Parental and BRCA1-KO cells rescued or not with either WT or I26A mutant BRCA1-TULIP2 constructs. Four independent experiments with 5 technical repeats were performed (N=4). Average and standard deviations are displayed. (F-G) Analysis by immunofluorescence against RAD51 and BRCA1 of Parental and BRCA1-KO cells rescued or not with either WT or I26A BRCA1-TULIP2 constructs. Quantification of percentage (%) of cells with equal or more than 10 RAD51 foci (G) and representative images (F) are provided. Size bars in fluorescence microscopy images represent 10  $\mu$ m. Three independent experiments were performed per condition displaying the average and standard deviation (N=3). The average of each independent experiment is represented by an orange, green or purple circle. P-values correspond to two-tailed unpaired t-tests. (H) Volcano plot depicting statistical differences between BRCA1-WT and DGG TULIP2 constructs. Each dot represents a protein (I). Volcano plot depicting statistical difference between BRCA1-WT-TULIP2 samples compared to BRCA1-I26A TULIP2 samples as controls (J) Volcano plot depicting statistical difference between BRCA1-WT-TULIP2 samples compared to  $\Delta$ GG and BRCA1-I26A TULIP2 samples pooled together as controls. p-values correspond to two-tailed unpaired t-tests. Each dot represents a protein.

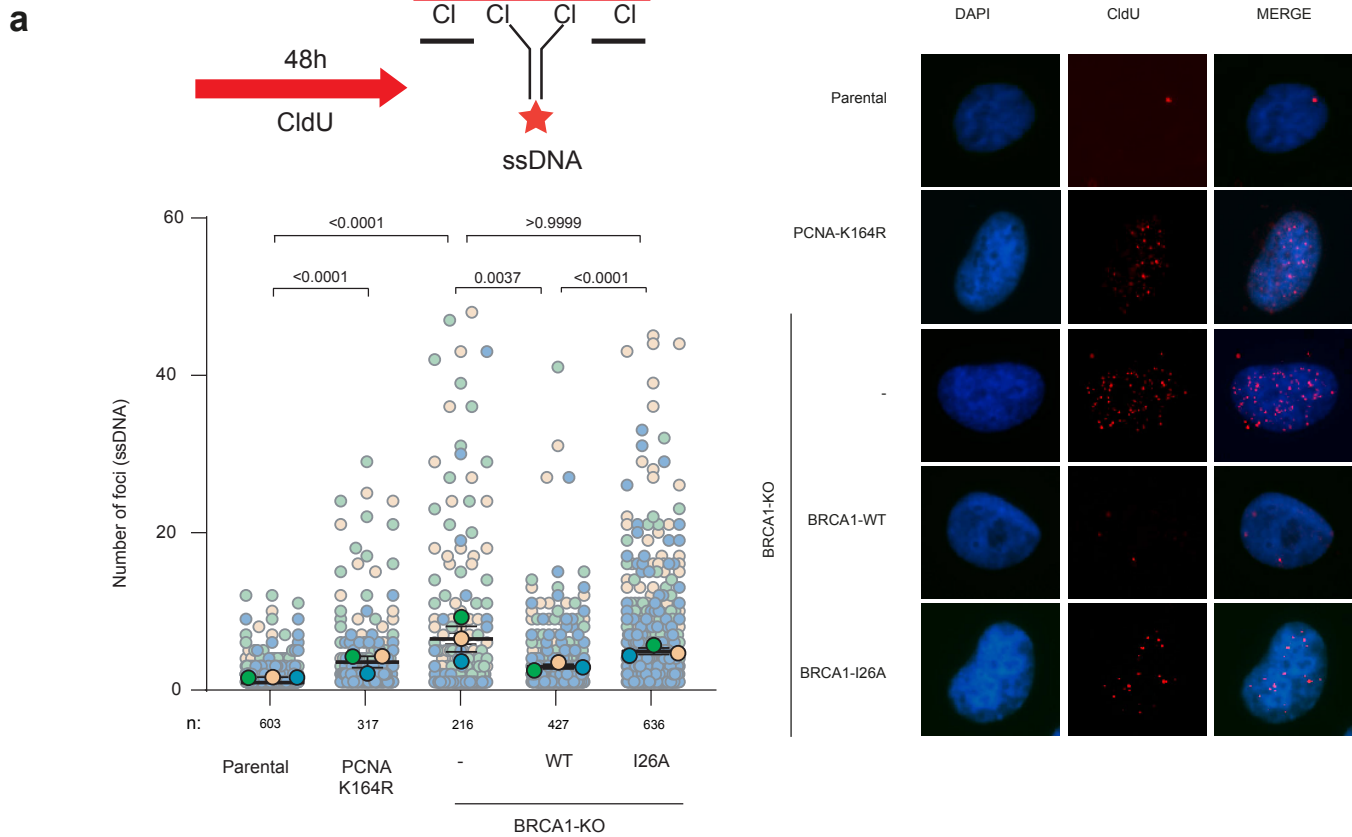

**b**

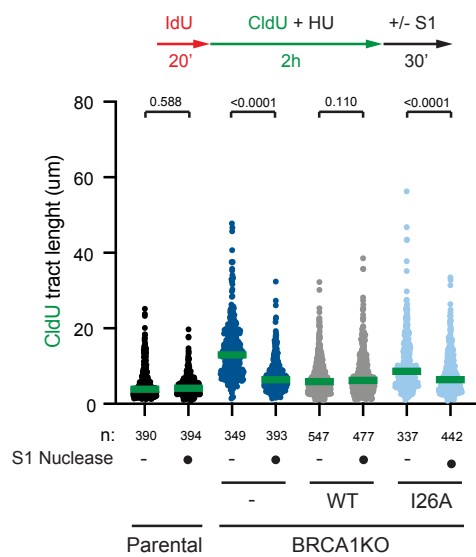

**c**

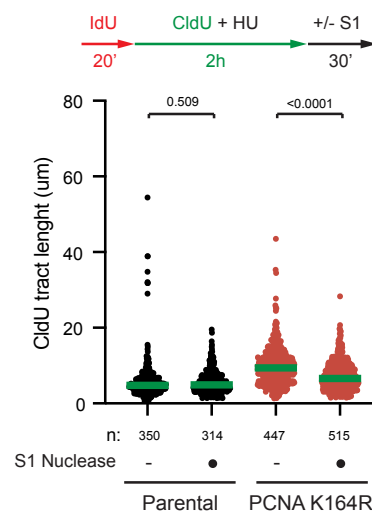

**Supplementary Figure 2.** Additional ssDNA gaps analysis. (A) ssDNA gaps analysis by immunofluorescence. Top: Scheme of CldU treatment for 48 h and immunostaining. Bottom: Quantification of number of ssDNA foci after CldU incubation is presented. Each circle represents a cell. Average and SEM are displayed. n: indicates the number of analyzed nuclei from 3 independent experiments. Two-tailed Kruskal-Wallis tests were performed and p-values of pair-wise comparisons are shown in the figure. Representative images are provided. (B-C) Formation of ssDNA gaps upon induction of mild replication stress by 0.5mM hydroxyurea in Parental, BRCA1-KO and BRCA1-WT and BRCA1-I26A rescued cells (B) and in Parental and PCNA-K164R mutant cells (C). Top: Scheme of the IdU/CldU pulse-labelling protocol, followed by S1 nuclease treatment. Bottom: CldU tract lengths in the indicated cell lines with and without S1 nuclease treatment. Each dot represents one fiber and the green bar represents the median. n: indicates number of measured fibers from 2 independent experiments. p values corresponding to two-tailed Mann-Whitney test are shown.

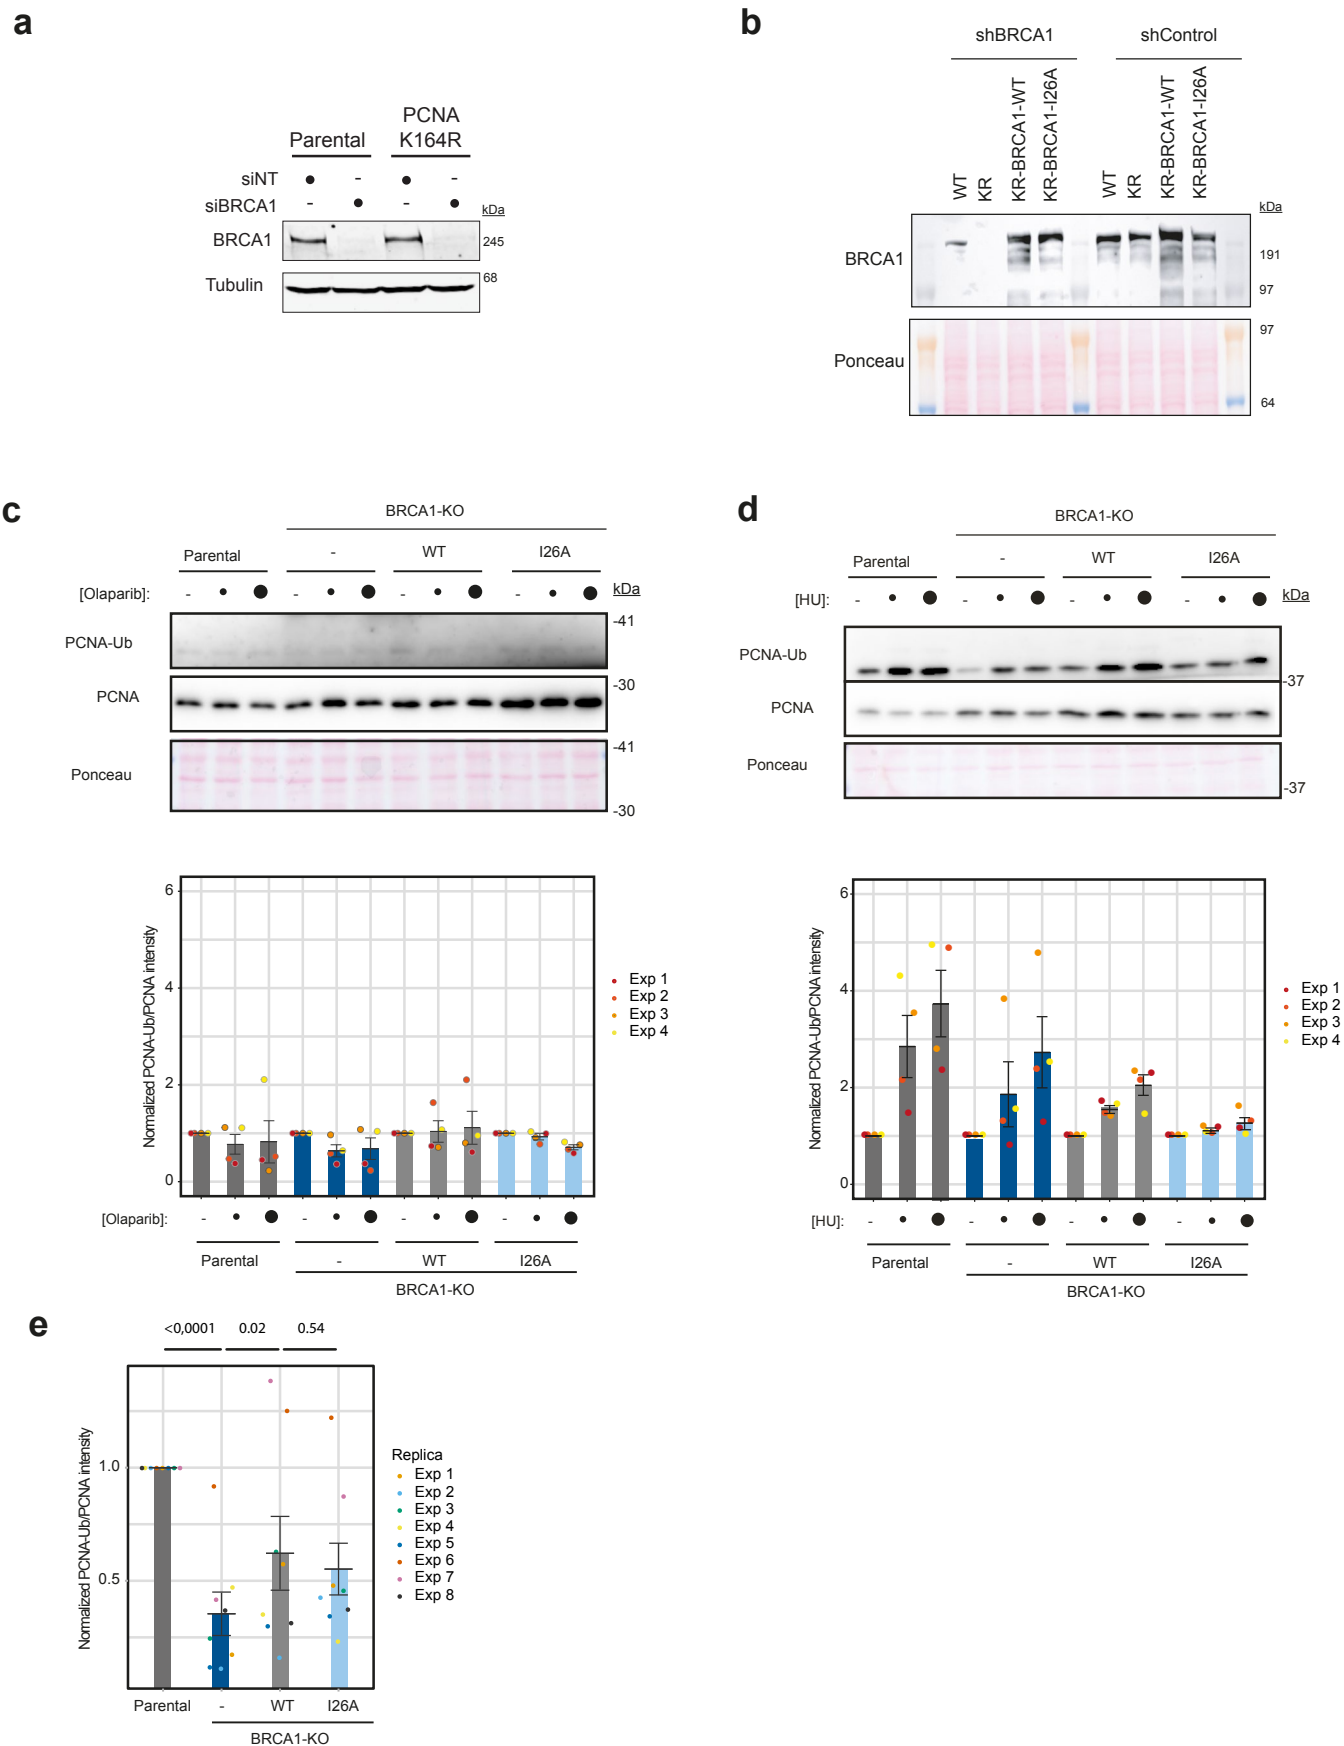

**Supplementary Figure 3. PCNA Ubiquitination levels (A)** Immunoblot showing BRCA1 levels of Parental and PCNA-BRCA1 cells after treatment with a control- or BRCA1-targeting siRNA from Figure 3A. Tubulin was used as loading control. **(B)** Immunoblot analysis of BRCA1 levels from experiments in Figure 3 D-E **(C-D)** Immunoblot analysis of endogenous PCNA ubiquitination levels after genotoxic treatments. Parental and BRCA1-KO cells rescued or not with either BRCA1-WT-GFP or BRCA1-I26A constructs were treated for 3h with **(C)** Olaparib (0, 1 $\mu$ M, 10 $\mu$ M) or **(D)** Hydroxyurea (0, 0.5mM, 5mM), lysed and analyzed by immunoblotting. Quantification of PCNA-Ub/PCNA ratio normalized to untreated conditions for each cell line is provided. Each dot represents the quantification of an independent experiment. Average and SEM is depicted **(E)** Quantification of PCNA-Ub/PCNA levels in untreated conditions normalized to Parental levels from the experiment in C and D. Bars represent the averages, error bars represent the SEM. Numbers above indicate p-values for two-tailed RM-Anova tests.

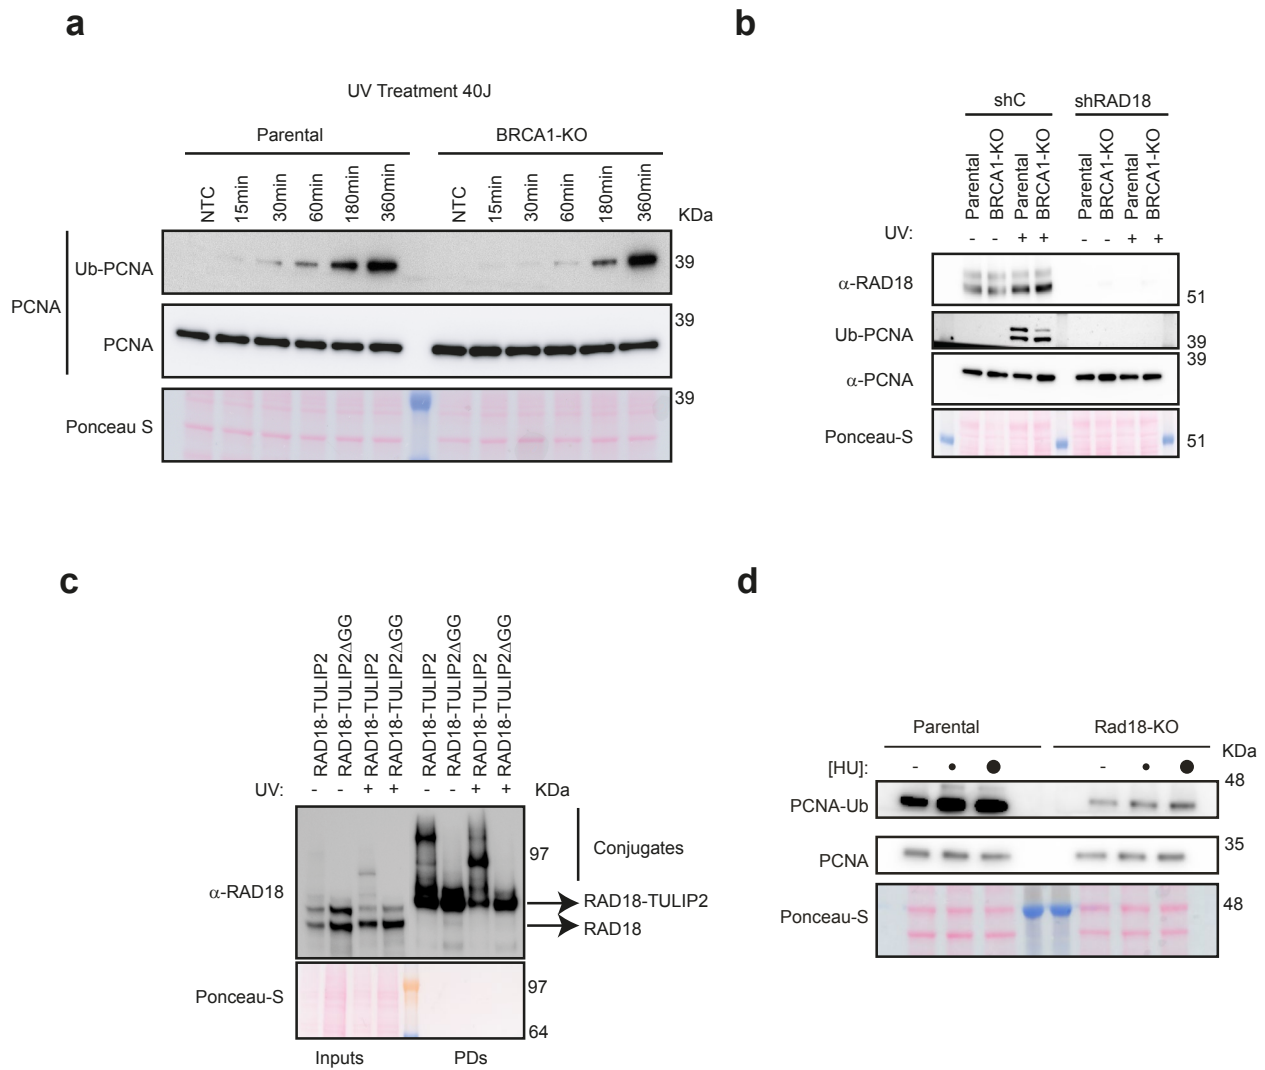

**Supplementary Figure 4. RAD18 immunoblotting data. A.** Analysis by immunoblotting of PCNA ubiquitination after 40 J/m<sup>2</sup> UV irradiation in a time course manner in Parental and BRCA1-KO cells. **B.** Analysis by immunoblotting against PCNA 5h after 40 J/m<sup>2</sup> UV irradiation in Parental and BRCA1-KO cell after treating with a control or RAD18-targetting shRNA. **C.** Analysis by immunoblotting of RAD18-TULIP2 samples with and without 40 J/m<sup>2</sup> UV treatment. **D.** Analysis by immunoblotting of PCNA ubiquitination levels in Parental and RAD18-KO cells after treatment for 3h with 0, 0.5 mM or 5 mM of Hydroxyurea.

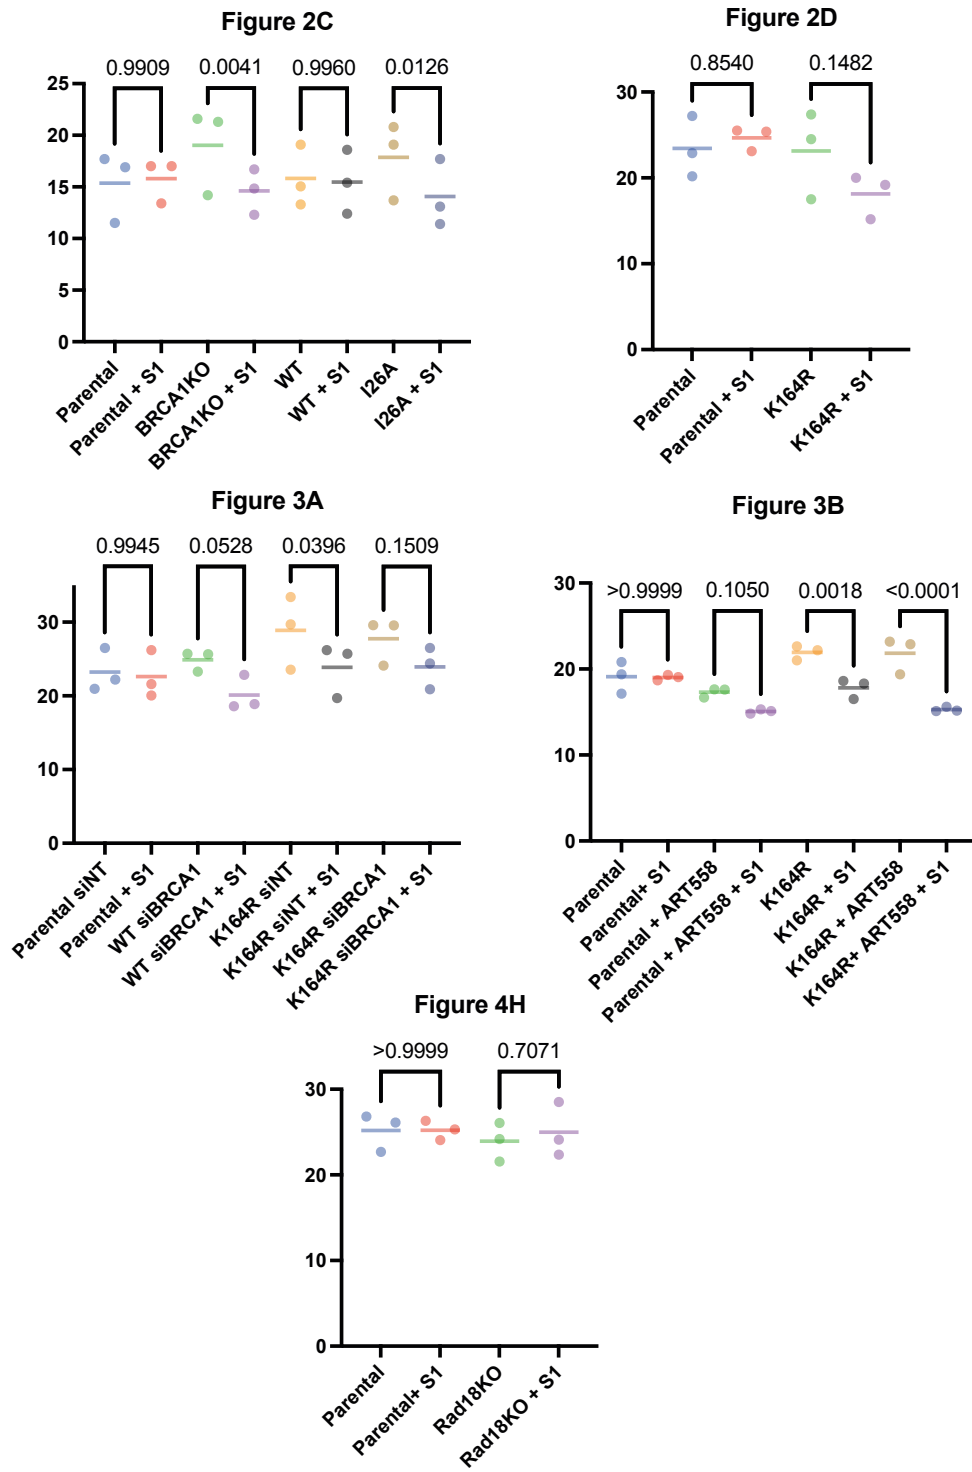

**Supplementary Figure 5.** Alternative statistical analysis of the different S1-fiber analysis showed in the manuscript. Repeated Measures ANOVA tests were performed using the medians of independent experiments. p - values of pairwise comparisons are indicated. Šídák method was applied for multiple testing correction.

| Primer Name         | Sequence                                                          | Use                           |
|---------------------|-------------------------------------------------------------------|-------------------------------|
| BP-FW-BRCA1         | GGGGACAAGTTTGTACAAAAAAGCAGGCTTCatggattatctgctcttcgcgt<br>t        | BRCA1 TULIP2 Cloning          |
| BP-RV-BRCA1-no-STOP | GGGGACCACTTTGTACAAGAAAGCTGGGTgtagtggcTgtgggggatct                 | BRCA1 TULIP2 Cloning          |
| FW-BRCA1-I26A       | GCTATGCAGAAAATCTTAGAGTGTCCCGCTGTCTGGAGTTGATCAAG<br>GAACCT         | Introduction of I26A mutation |
| RV-BRCA1-I26A       | AGGTTTCCTTGATCAACTCCAGACAGGCGGGACACTCTAAGATTTTCTG<br>CATAGC       | Introduction of I26A mutation |
| BP-FW-RAD18         | GGGGACAAGTTTGTACAAAAAAGCAGGCTTCatggactcctggccgag                  | RAD18 TULIP2 Cloning          |
| BP-RV-RAD18         | GGGGACCACTTTGTACAAGAAAGCTGGGTaattcctattacgcttgtttcttggt<br>tcaatc | RAD18 TULIP2 Cloning          |
| RemoveStop-RAD18-FW | GCTGAGATTGAACCAAGAAACAAGCGTAATAGGAATCCAACCTTCTTG<br>TACAAAGTTGGC  | RAD18 TULIP2 Cloning          |
| RemoveStop-RAD18-RV | GCCAACCTTGTACAAGAAAGTTGGATTCTATTACGCTTGTTTCTTGGT<br>TCAATCTCAGC   | RAD18 TULIP2 Cloning          |

**Supplementary Table 1: List of primers.**

| Antibody                                               | Target            | Dilution         | Company                   |
|--------------------------------------------------------|-------------------|------------------|---------------------------|
| <b>Primary Antibodies</b>                              |                   |                  |                           |
| Rabbit anti-BARD1 (A300-263A)                          | BARD1             | 1:1000           | Bethyl                    |
| Rabbit anti-BRCA1 (9010S)                              | BRCA1             | 1:1000           | Cell Signaling Technology |
| Mouse anti-BRCA1 (OP92)                                | BRCA1             | 1:1000           | Millipore                 |
| Mouse anti-BRCA1 (sc-6954)                             | BRCA1             | 1:100            | Santa Cruz                |
| Mouse anti $\alpha$ -Tubulin (#T9026)                  | $\alpha$ -Tubulin | 1:20000          | Sigma Aldrich             |
| Mouse anti-PCNA (Sc-56)                                | PCNA              | 1:5000           | Santa Cruz                |
| Rabbit anti-RAD18 (9040S)                              | RAD18             | 1:1000           | Cell Signaling Technology |
| Rabbit anti-RAD51 (70-001)                             | RAD51             | 1:15000          | BioAcamedia               |
| Rabbit anti-RPA1 (NA18-100UG)                          | RPA1              | 1:1000           | Millipore                 |
| Mouse anti-Ubiquitin (Sc-8017)                         | Ubiquitin         | 1:1000           | Santa Cruz                |
| Rat anti-BrdU (ab6326)                                 | BrdU/CldU         | 1:200 –<br>1:250 | Abcam                     |
| anti-BrdU (#347580)                                    | BrdU/IdU          | 1:250            | Becton Dickinson          |
| <b>Secondary Antibodies</b>                            |                   |                  |                           |
| HRP-conjugated Donkey anti-Rabbit (31458)              | Anti-Rabbit       | 1:5000           | Thermo Fisher Scientific  |
| HPR-conjugated Goat antiMouse IgG (H+L) (31432)        | Anti-Mouse        | 1:5000           | Thermo Fisher Scientific  |
| HRP-conjugated Goat anti-Rabbit (111-035-144)          | Anti-Rabbit       | 1:5000           | Jackson Immuno Research   |
| HPR-conjugated Goat anti-Mouse IgG (H+L) (115-035-146) | Anti-Mouse        | 1:5000           | Jackson Immuno Research   |
| Secondary Alexa Flour 594                              | Anti-Rat          | 1:1000           | Thermo Fisher Scientific  |
| Secondary Alexa Flour 488                              | Anti-Rabbit       | 1:1000           | Thermo Fisher Scientific  |
| Secondary Alexa Flour 594                              | Anti-Mouse        | 1:1000           | Thermo Fisher Scientific  |

**Supplementary Table 2: List of antibodies.** Working dilutions are indicated.
